# Supplementary material for: Neuromedin U promotes lung adenocarcinoma progression by enhancing nucleotide metabolism and potentiating fibrosis in the tumor microenvironment
Source: Research Square preprint supplement (doi:10.21203/rs.3.rs-8171505/v1), 2025-12-05
Supplement: Supplementary file 1 [file 8f2590f7a5435f2023f98fc0.pdf]

**Supplementary Information for**

**“Neuromedin U promotes lung adenocarcinoma progression by enhancing nucleotide metabolism and potentiating fibrosis in the tumor microenvironment”**

**Neuromedin U promotes lung adenocarcinoma progression by enhancing nucleotide metabolism and potentiating fibrosis in the tumor microenvironment**

Shih-Miao Li, Chi-Shuan Fan, Tzu-Yu Chen, Wen-Tsen Fang, Fang-Yu Tsai, Hui-Yu

Jao, Po-Tsun Shen, Zih-Syuan Cao, Yueh-Feng Wen, Yi-Ju Wu, Po-Jung Huang,

Tze-Sing Huang, Ya-Wen Chen, Ching-Chuan Kuo, B. Linju Yen, Ko-Jiunn Liu,

Chao A. Hsiung, I-Shou Chang, Shih Sheng Jiang\*

This file contains supplementary figures, tables, and additional methodological details referenced in the main manuscript.

The materials are organized in the following order:

- Supplementary Tables S1
- Supplementary Figures S1 - S5

All supplementary materials are cited in the main text, and figure/table legends are included with each item.

Please refer to these materials as needed for additional data supporting the findings in the main manuscript.

**Supplementary Table S1. Nucleic acid sequences of the probes and primers for the RT-qPCR experiment.**

| Oligonucleotide information |                            |                         |                             |
|-----------------------------|----------------------------|-------------------------|-----------------------------|
| Oligonucleotide name        | UPL probe ROCHE            | Forward primer (5'-3')  | Reverse primer (5'-3')      |
| NMU                         | #25 (cat. no. 04686993001) | CGTCTTTTCTGTCCATTGATTCT | GCATTCCCATAATCATAAAGCAA     |
| IMPDH1                      | #22 (cat. no. 04686969001) | CCATGGCCTGCACTCTTA      | GTGGACACTGGGGTGCAT          |
| GMPS                        | #78 (cat. no. 04689011001) | GCTCTGTGCAACGGAGACT     | TGGTGGTGGCCATCCTTA          |
| RRM1                        | #49 (cat. no. 04688104001) | CCACATAATGGCAAACACTCTC  | GAGAAATCTCGGTCATAGATAATAGCA |
| NTSR1                       | #50 (cat. no. 04688112001) | GGAGACAGCCCGAGGAAC      | CTCCGGACTCCCAGCTTC          |
| ATIC                        | #89 (cat. no. 04689143001) | GAGGGACTGCAAAAGCTCTC    | GGAAATCCCGTCAACTCAGA        |

Supplementary Figure S1

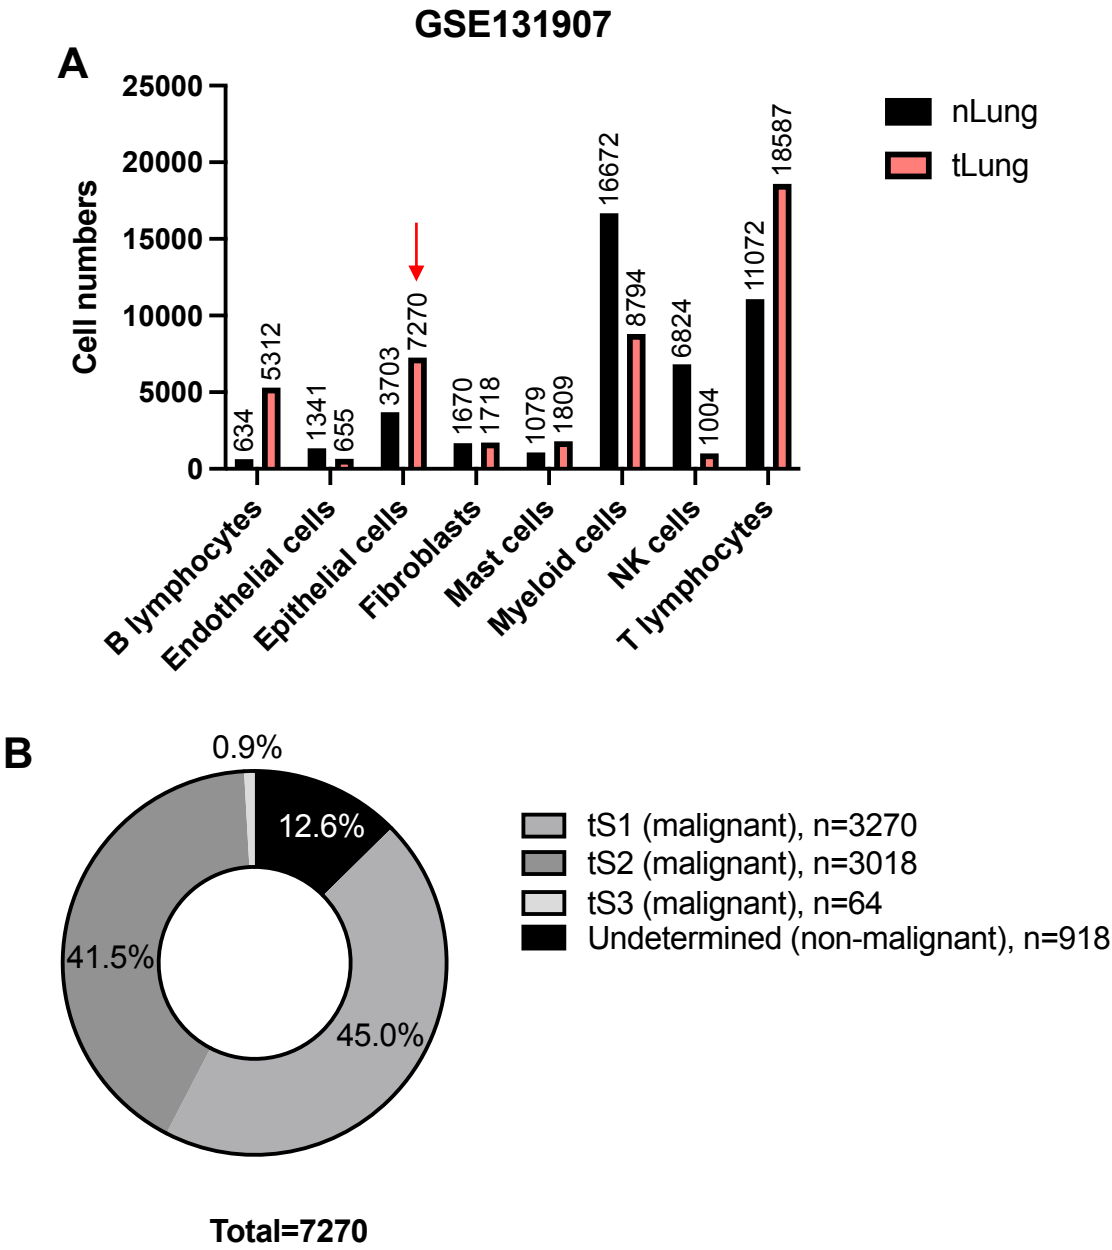

**Figure S1. Landscape of cell types analyzed by scRNA-seq dataset GSE131907.**

- (A) Distribution of major cell types in the GSE131907 dataset, with 7270 epithelial cells indicated by red arrow identified in the tumor lung (tLung) group.
- (B) The total number and proportion of tumor epithelial cells, further categorized into tS1, tS2, tS3, and undetermined cell types.

## Supplementary Figure S2

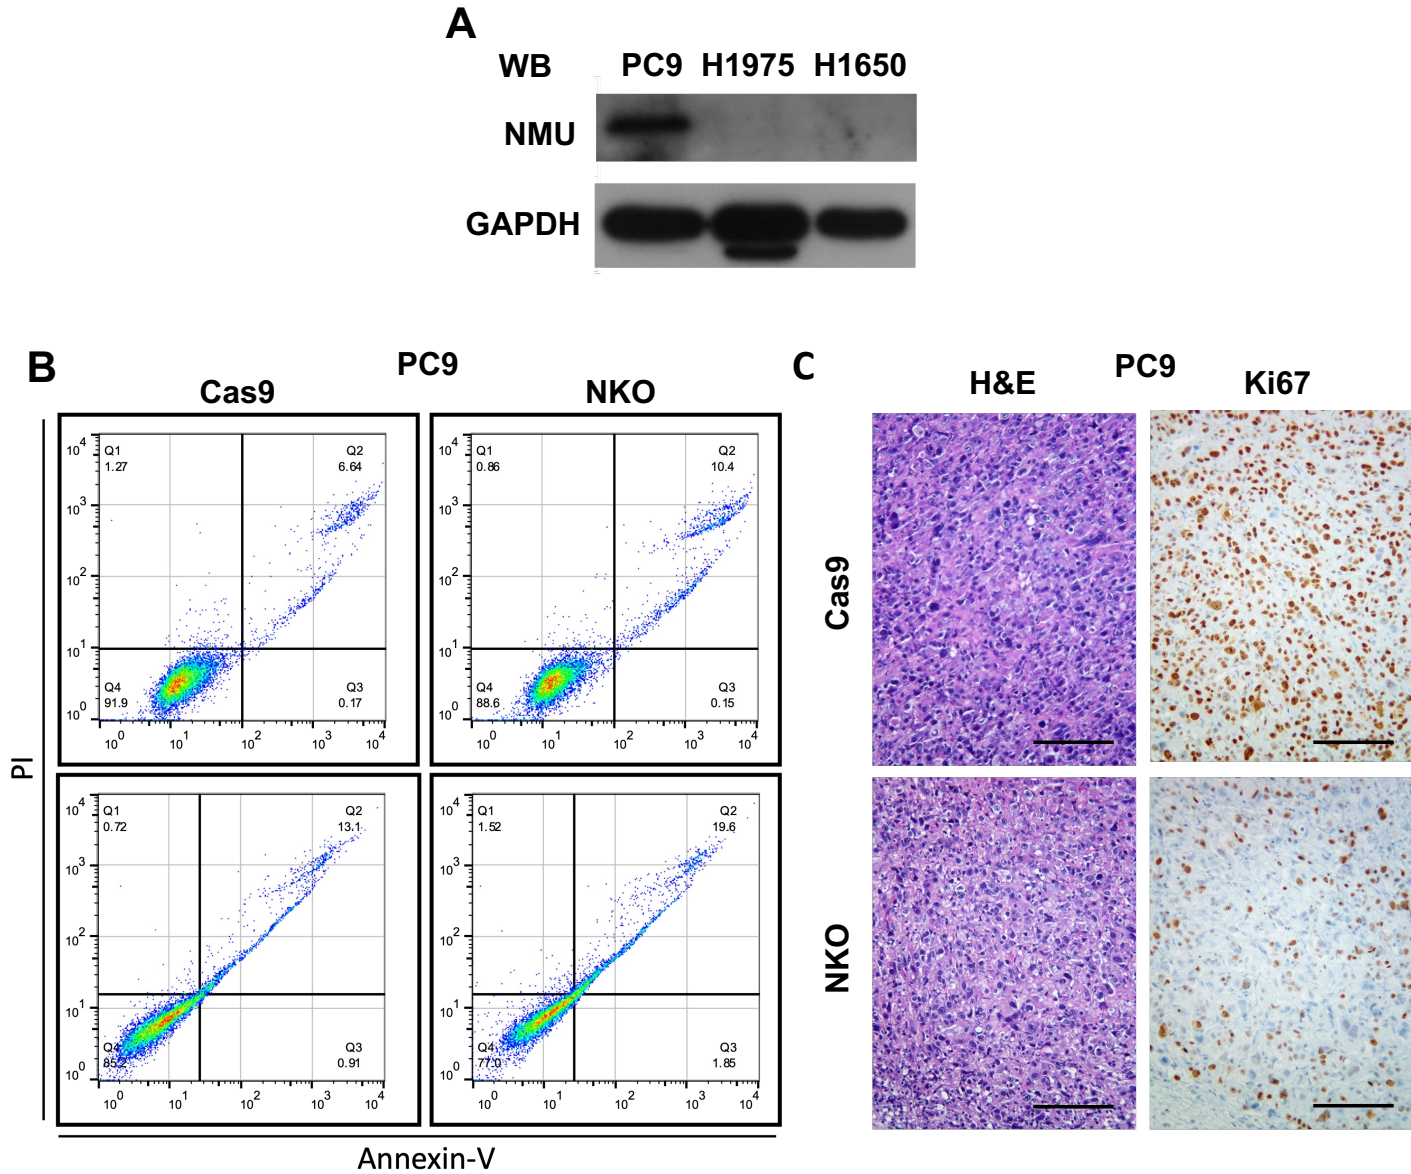

**Figure S2. Effects of *NMU* knockout on cell apoptosis and xenograft tumor proliferation.**

(A) Western blot analysis of NMU protein expression profile in NSCLC cell lines.

(B) FACS analysis of apoptosis in PC9-Cas9 and PC9-NKO clones. Upper panel: 24 hours post seeding, lower panel: 48 hours post seeding.

(C) Hematoxylin staining and Ki67 expression in PC9-Cas9 and in PC9-NKO tumors. Scale bar, 100  $\mu$ m.

## Supplementary Figure S3

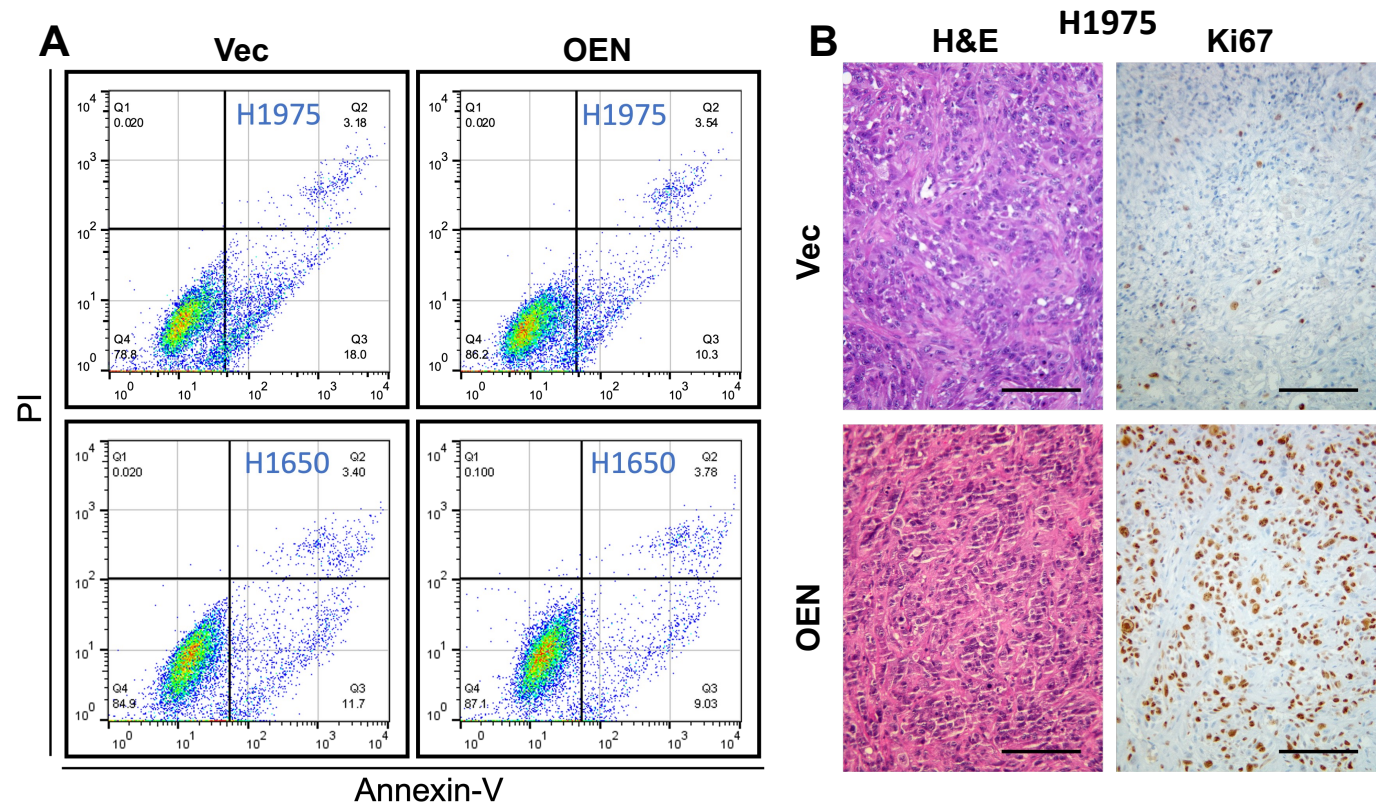

**Figure S3. Effects of *NMU* overexpression on cell apoptosis and xenograft tumor proliferation.**

- (A) FACS analysis of apoptosis. Upper panels: H1975 cells; lower panels: H1650 cells.
- (B) Hematoxylin staining and Ki67 expression in tumors from H1975 cells overexpressing *NMU*. Scale bar, 100  $\mu$ m.

## Supplementary Figure S4

**A**

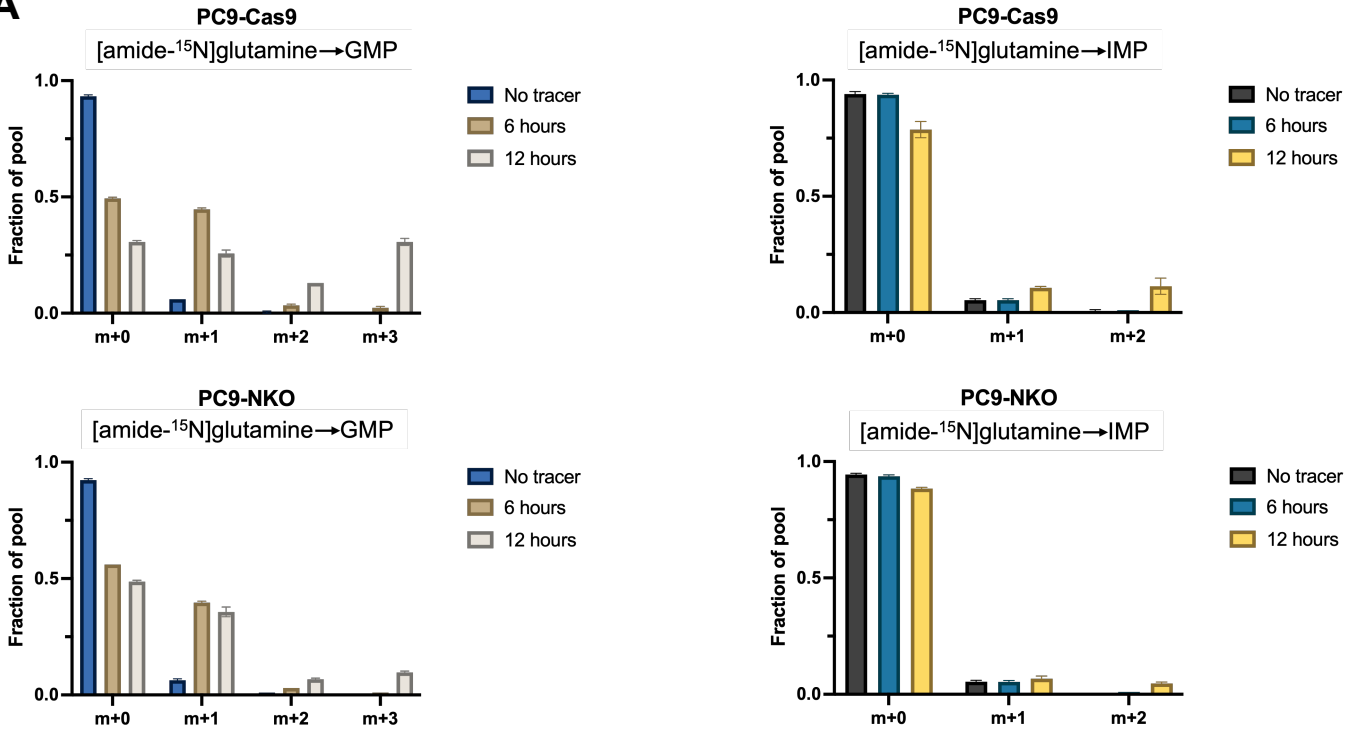

**B**

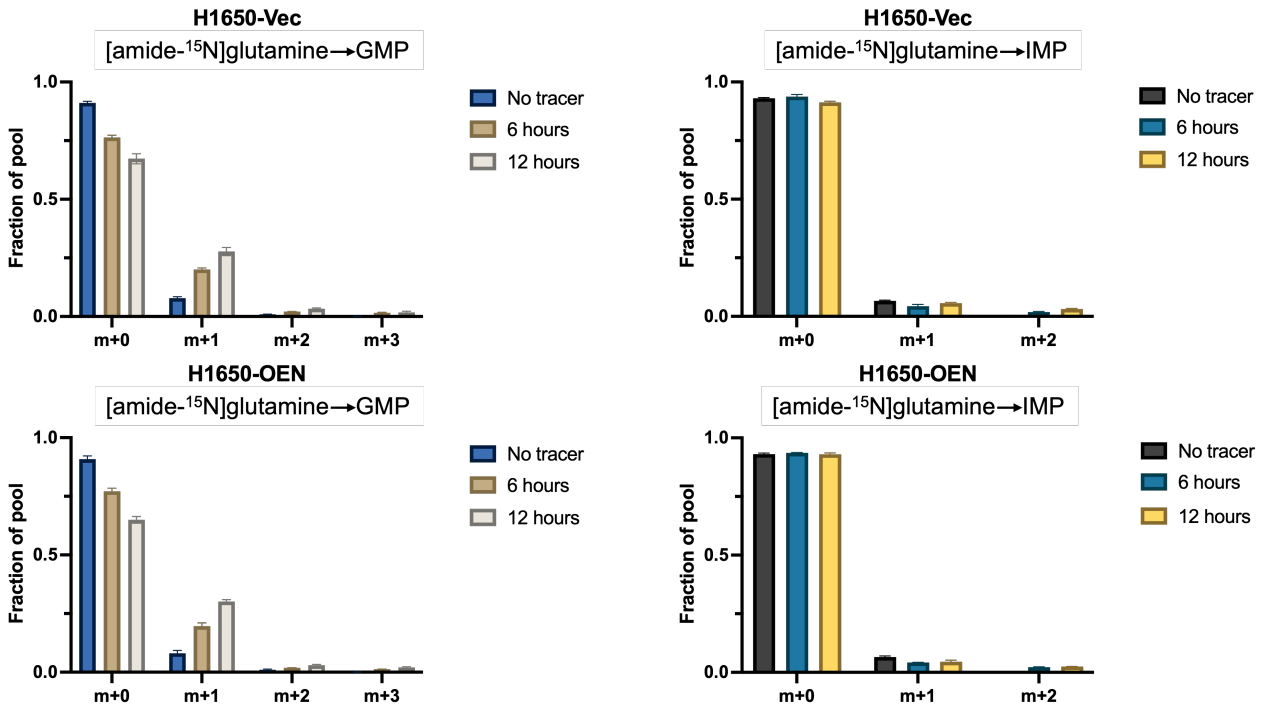

**Figure S4. Fractional <sup>15</sup>N-labeling of purine nucleotides in PC9 and H1650 cells**

- (A) Fractional enrichment of <sup>15</sup>N-labeled IMP and GMP isotopologues (m+1, m+2, and m+3) in PC9 control and *NMU* knockout clones following 6 h and 12 h incubation with [amide-<sup>15</sup>N]glutamine, as determined by LC-MS.
- (B) Fractional enrichment of <sup>15</sup>N-labeled IMP and GMP isotopologues in H1650 control and *NMU*-overexpressing clones under the same labeling conditions.

Supplementary Figure S5

A

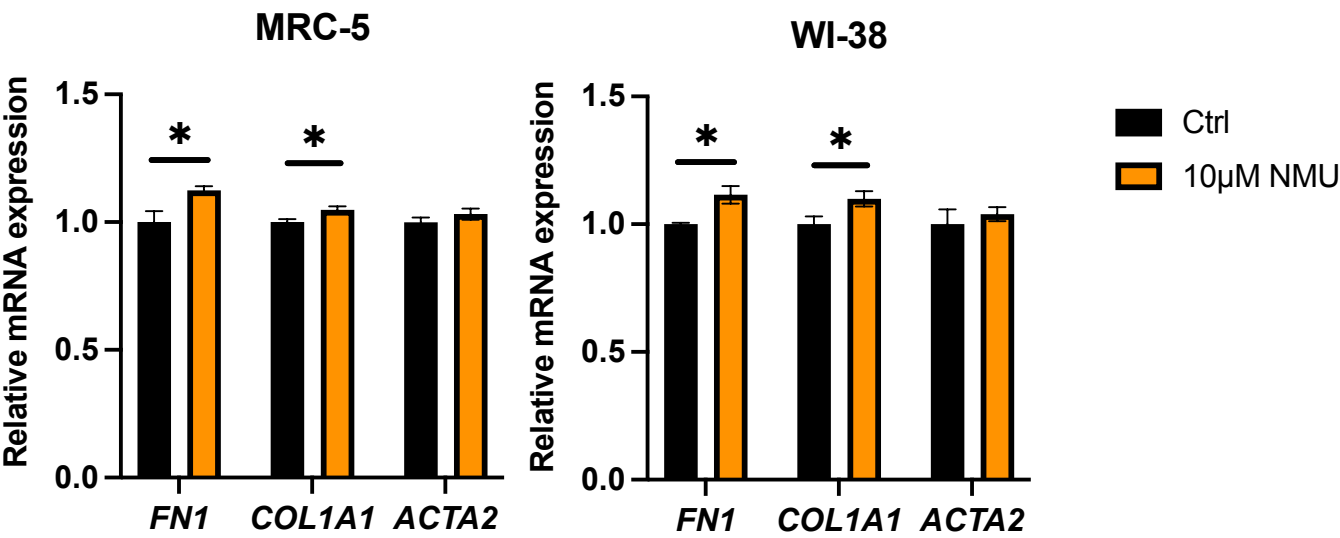

B

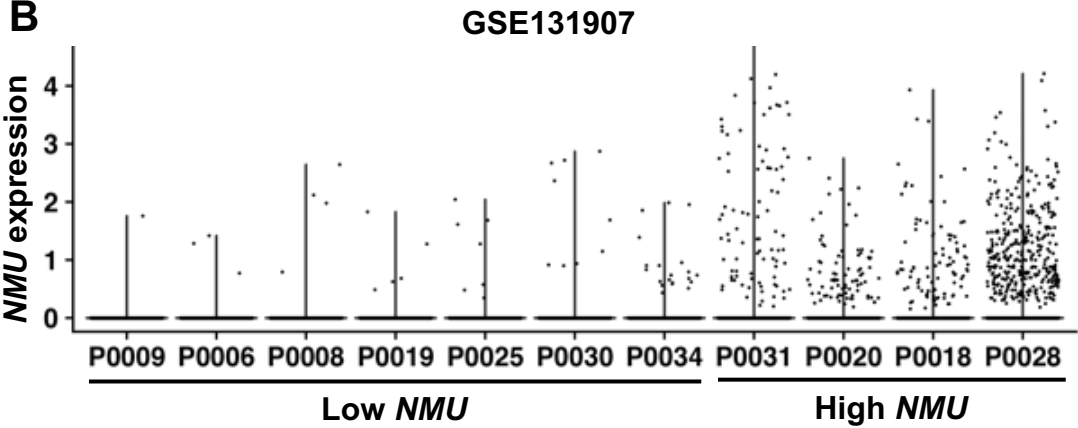

C

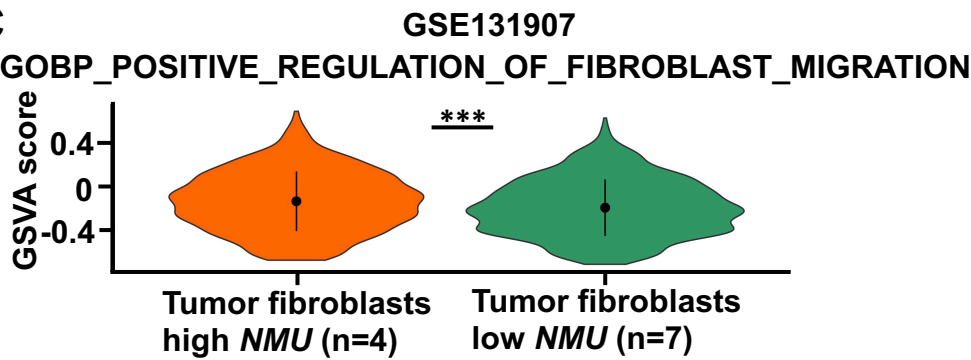

D

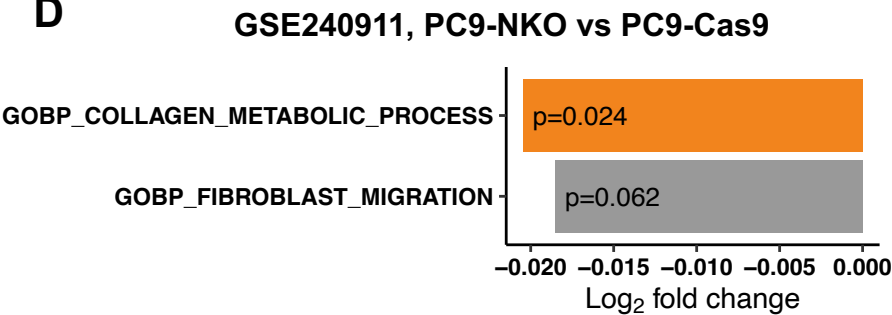

(To be continued)

**Figure S5. Integrated analysis of NMU-driven fibroblast activation using qPCR, scRNA-seq, and GSVA.**

- (A) Relative mRNA expression of *FN1*, *COL1A1*, and *ACTA2* in human lung fibroblast cell lines (MRC-5 and WI-38) treated with NMU peptide (10  $\mu$ M, 24 h), as measured by quantitative PCR
- (B) Violin plots showing *NMU* expression levels across 11 LUAD tumor samples, ranked by the percentage of *NMU* expression per sample in scRNA-seq dataset GSE131907.
- (C) GSVA analysis of fibroblast showing significant increase in the GOBP\_POSITIVE\_REGULATION\_OF\_FIBROBLAST\_MIGRATION gene set score in the high *NMU* expression group.
- (D) GSVA analysis of fibroblasts co-cultured with NSCLC cells, revealing significant downregulation of the collagen metabolic process pathway and a decreasing trend in fibroblast migration pathway activity in PC9-NKO compared to PC9-Cas9 clones.
