# Supplementary material for: Neuromedin U promotes lung adenocarcinoma progression by enhancing nucleotide metabolism and potentiating fibrosis in the tumor microenvironment
Source: Research Square preprint supplement (doi:10.21203/rs.3.rs-8171505/v1), 2025-12-05

### Figure 2B - Original immunoblot images

Uncropped Western blot membranes used for Figure 2B. Bands corresponding to NMU and GAPDH are indicated. Red boxes denote regions shown in the main figure.

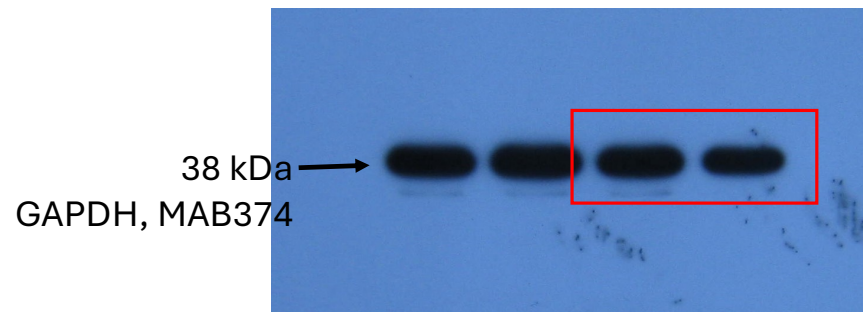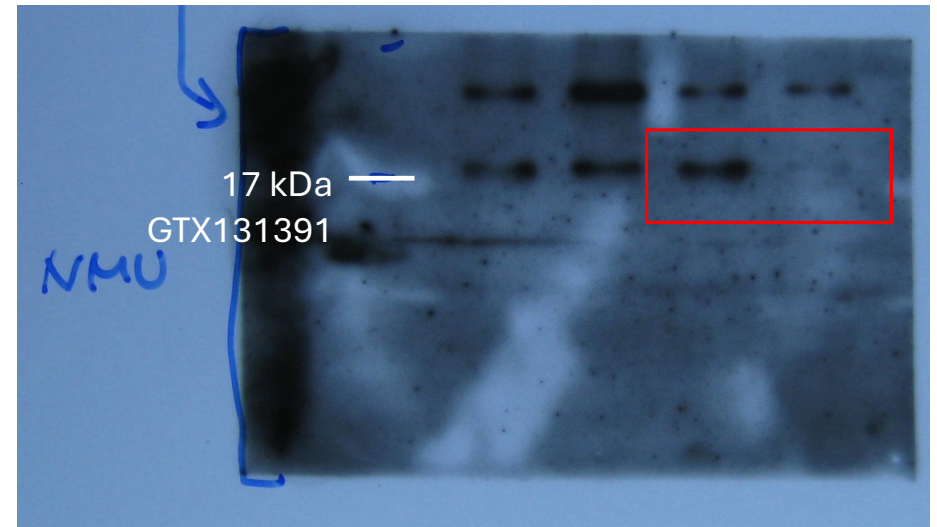

### Figure 3B - Original immunoblot images

Uncropped Western blot membranes used for Figure 3B. Bands corresponding to DDK and GAPDH are indicated. Red boxes denote regions shown in the main figure.

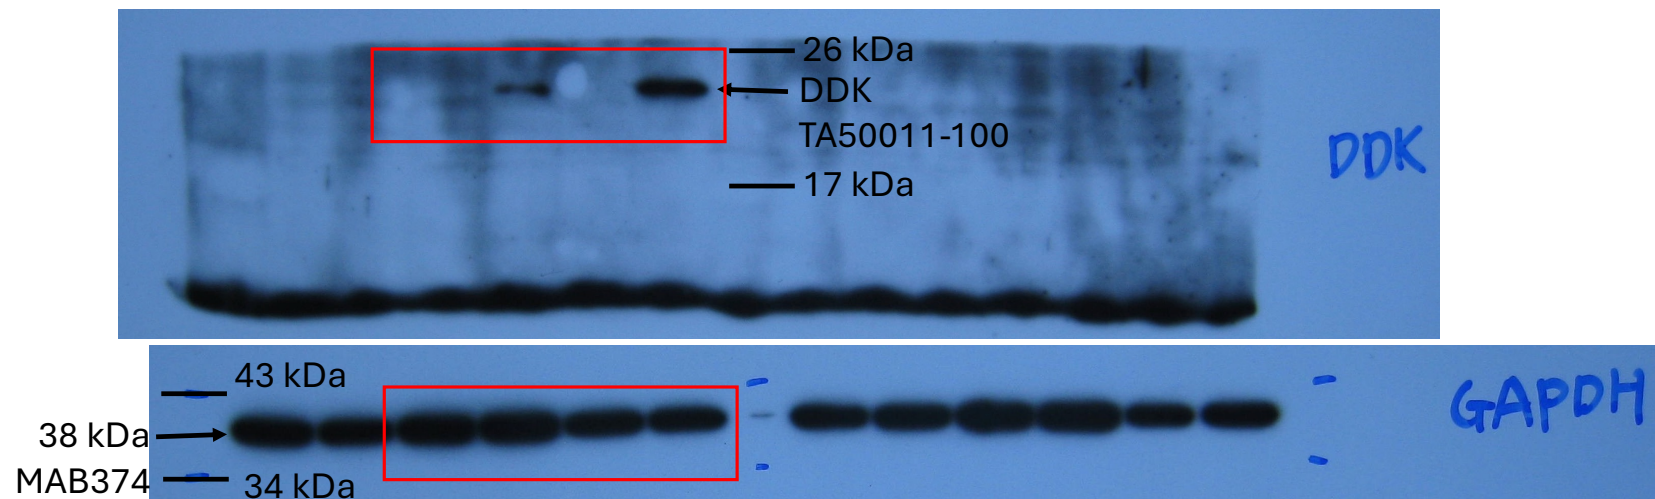

#### Figure 4L - Original immunoblot images

Uncropped Western blot membranes used for Figure 4L. Bands corresponding to pAKT-S473, pan AKT, IMPDH1, NMU and GAPDH are indicated. Red boxes denote regions shown in the main figure.

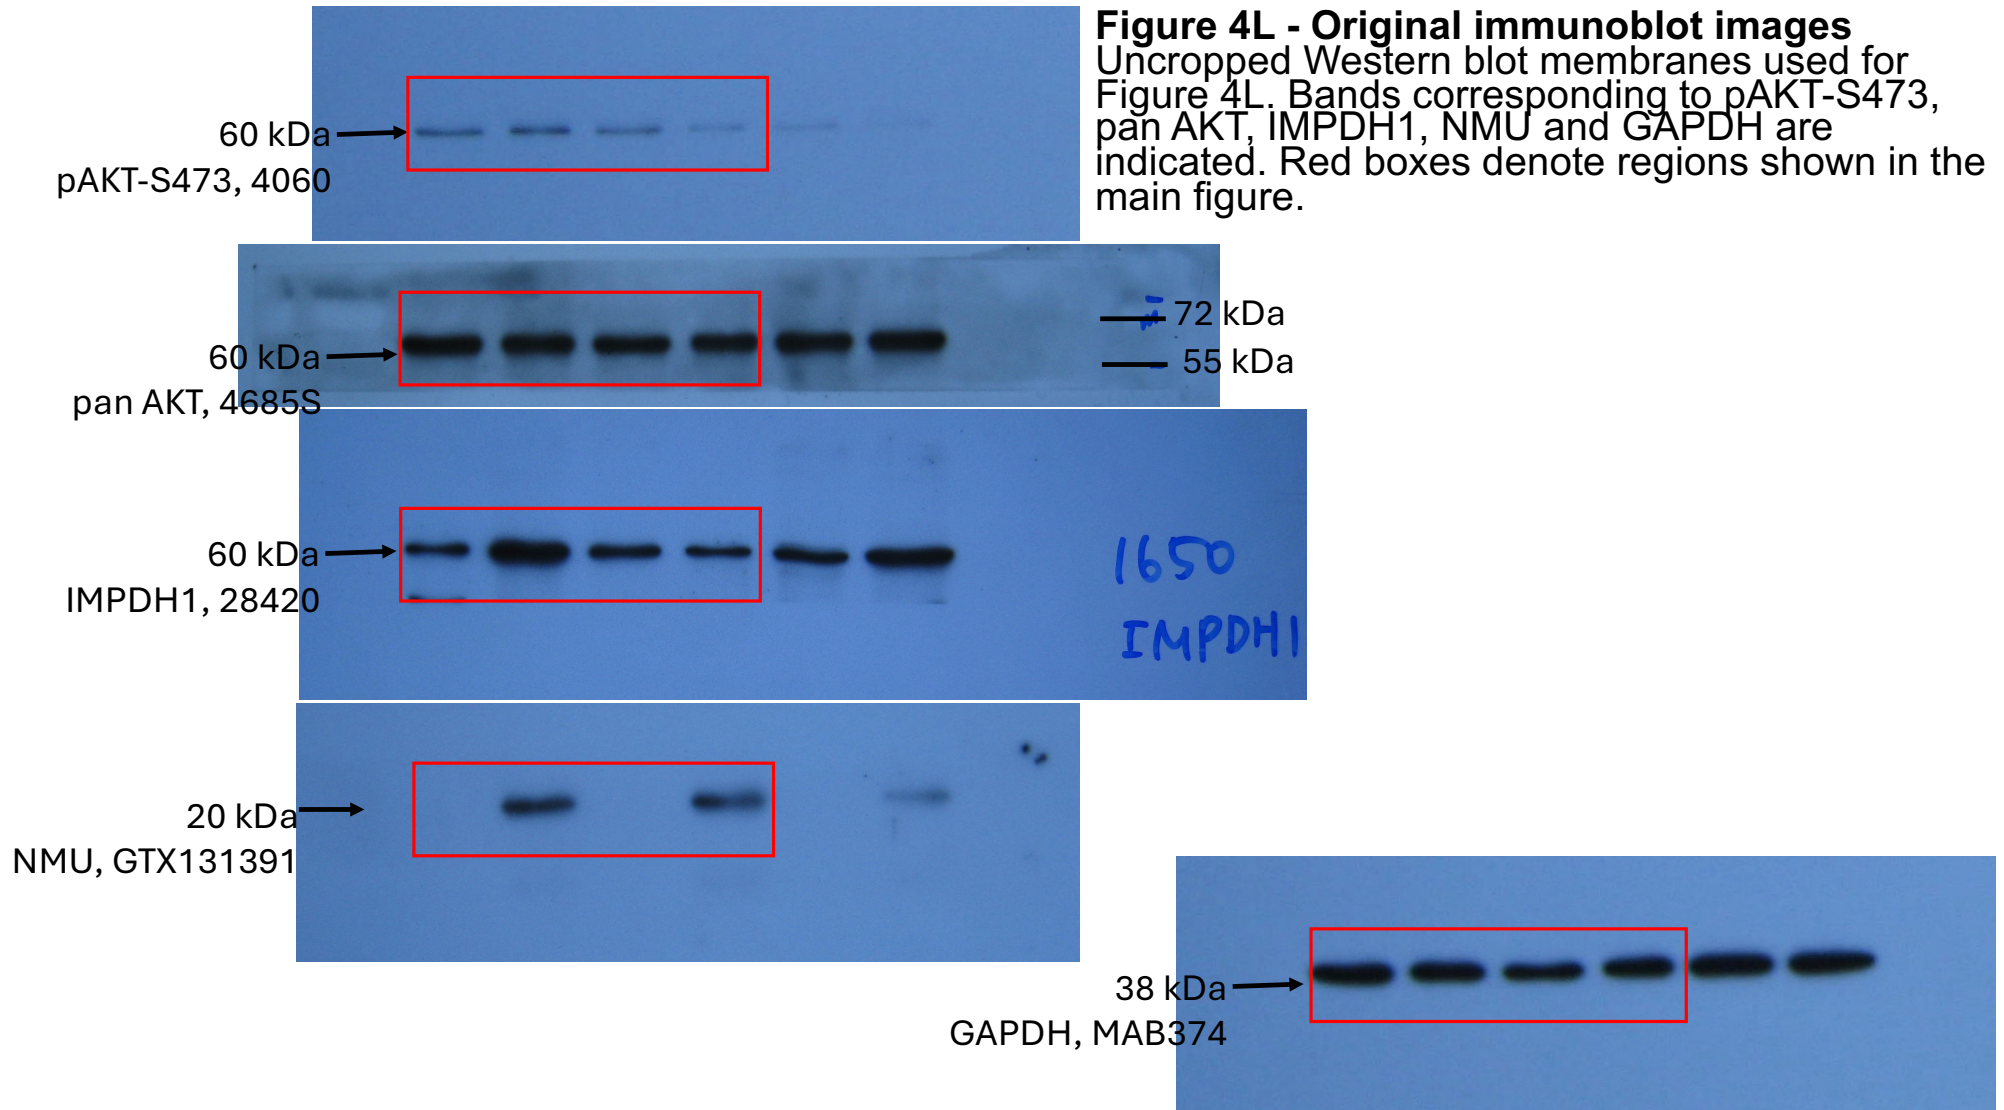

### Figure S2A - Original immunoblot images

Uncropped Western blot membranes used for Figure 2A. Bands corresponding to NMU and GAPDH are indicated. Red boxes denote regions shown in the main figure.

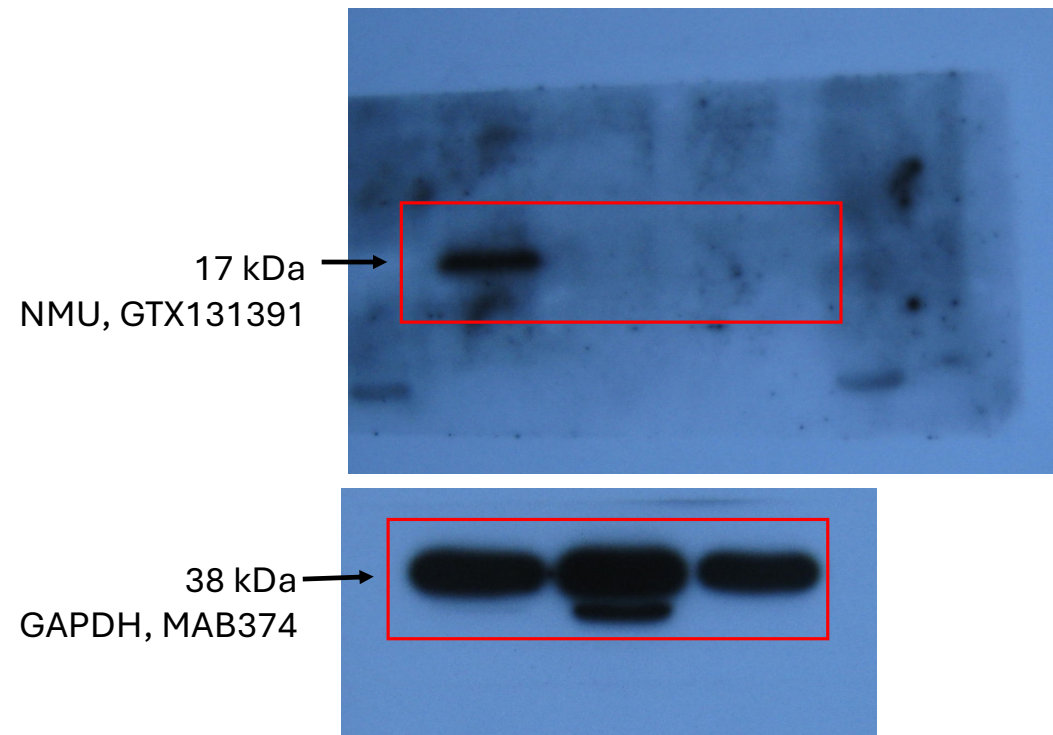

Supplement: Supplementary file 2 [file cf22c8b0e786e0a331a454c7.pdf]
